# Supplementary material for: Graphene oxide nanosheets as metal-free catalysts in the three-component reactions based on aryl glyoxals to generate novel pyranocoumarins
Source: Royal Society of Chemistry journal article supplement (doi:10.1039/c4nj00228h), 2014-01-01

**(Supplementary Data)**

**Graphene oxide nanosheets as metal-free catalyst in the three-component reactions based on aryl glyoxals to generate novel pyranocoumarins**

Saeed Khodabakhshi and Bahador Karami\*

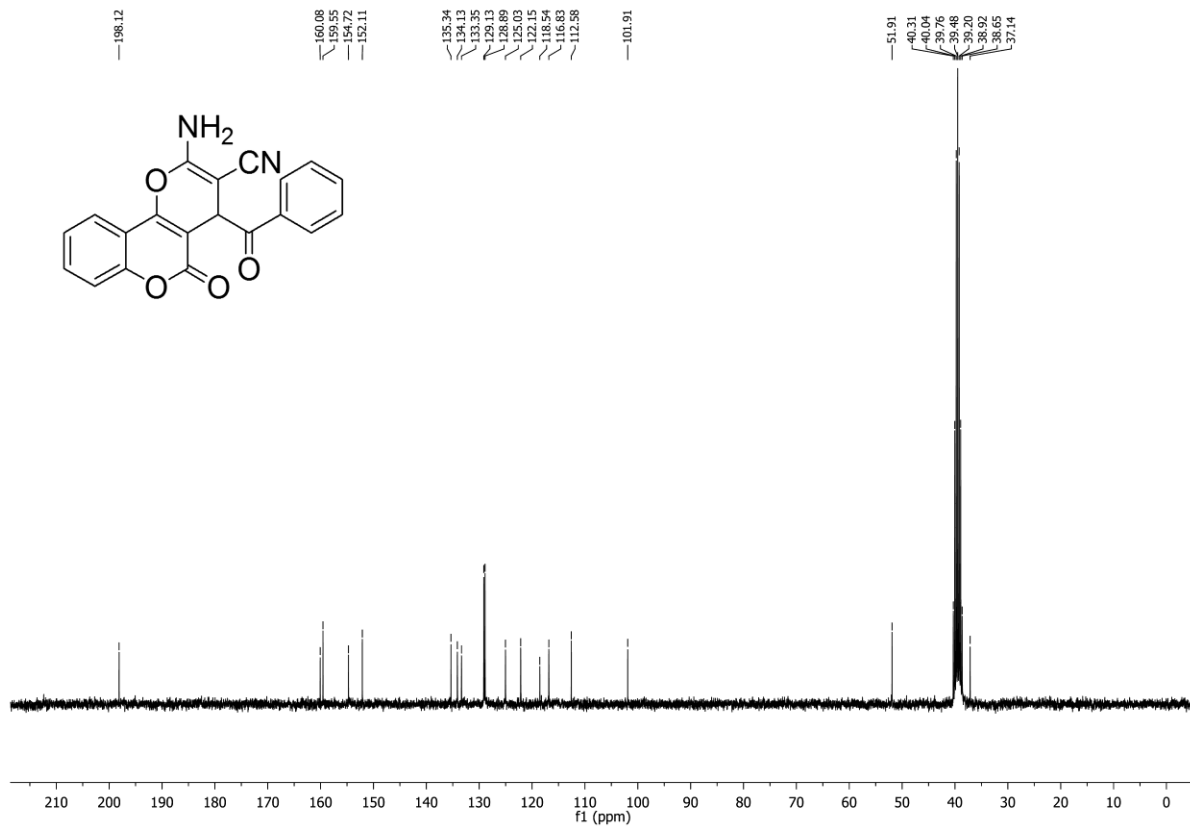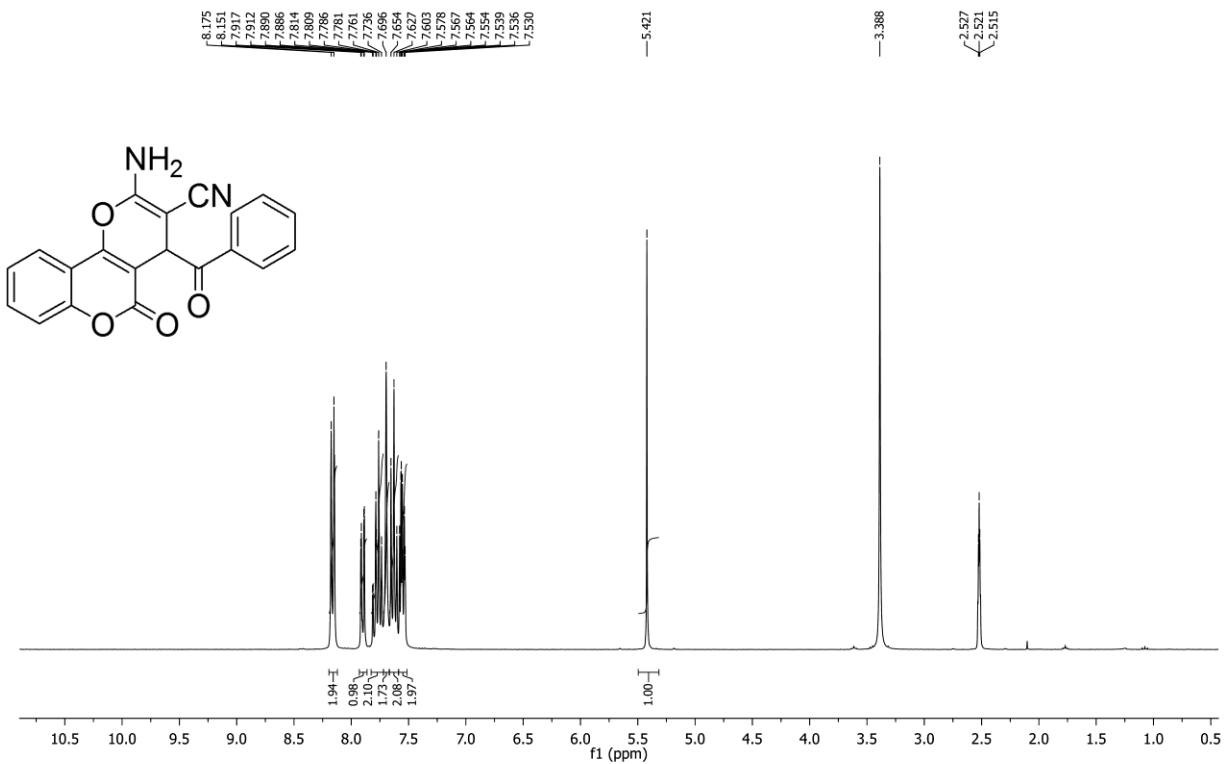

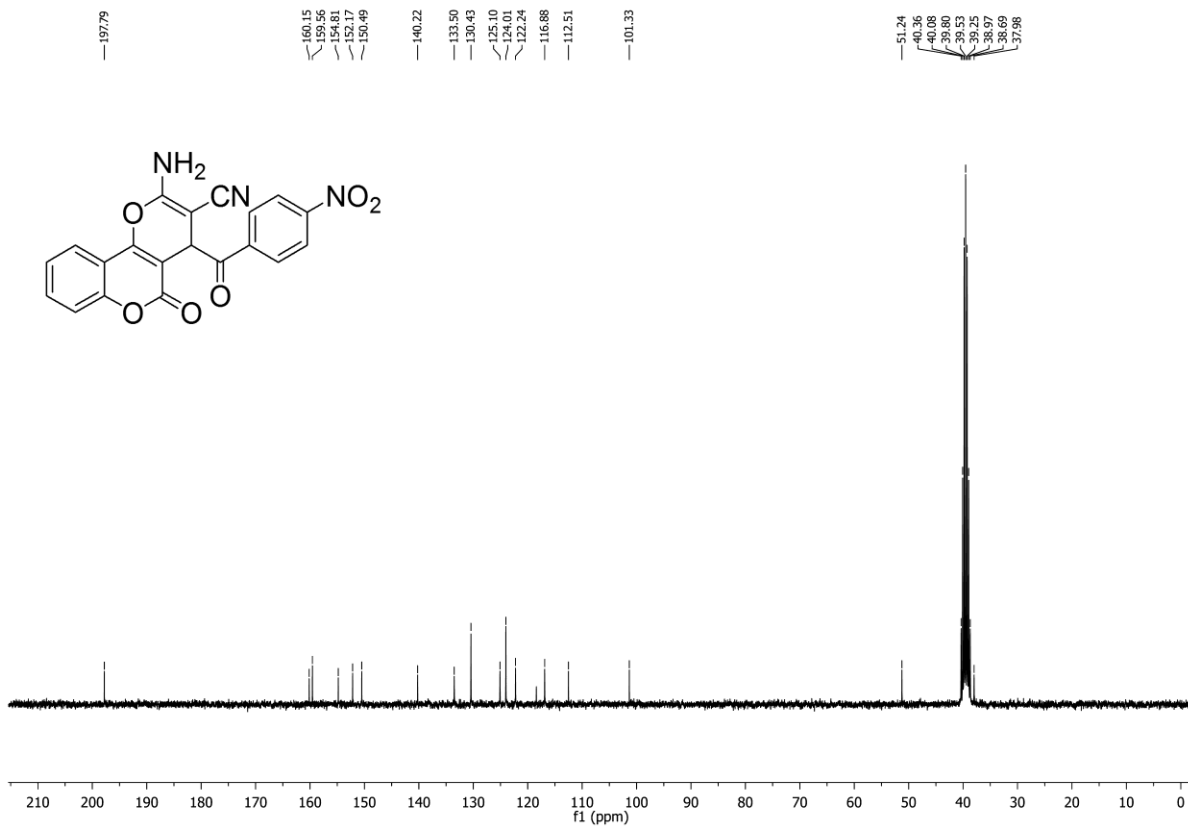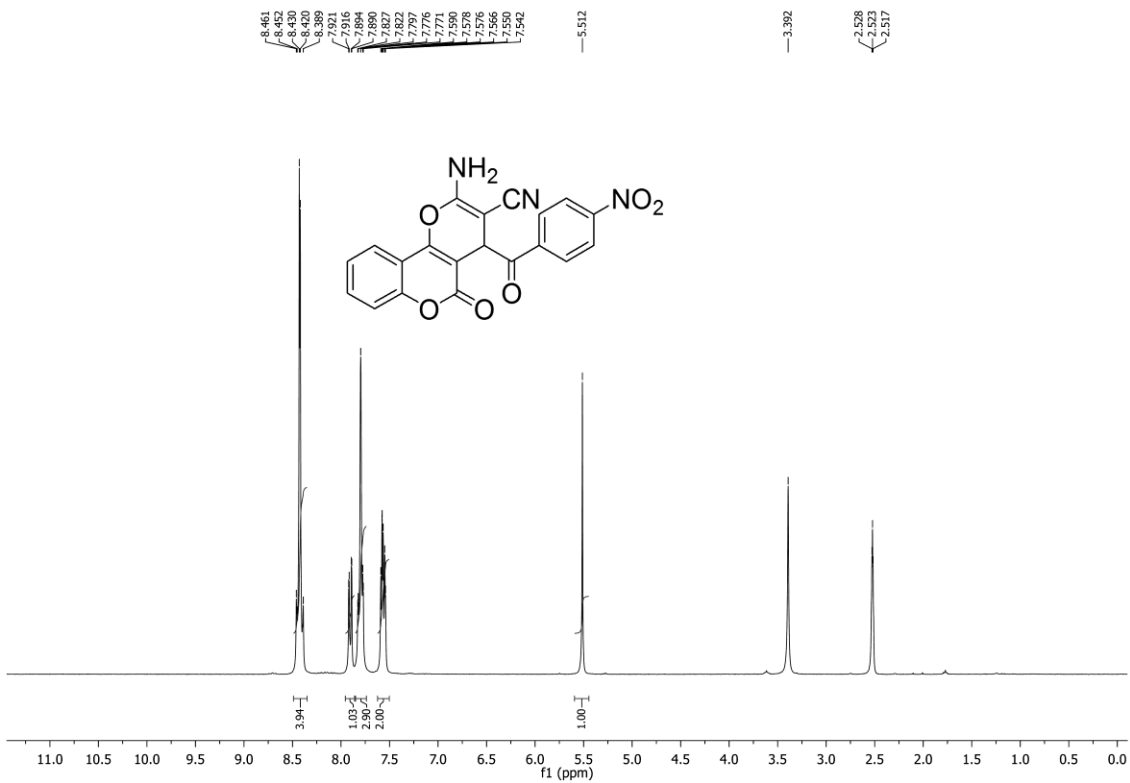

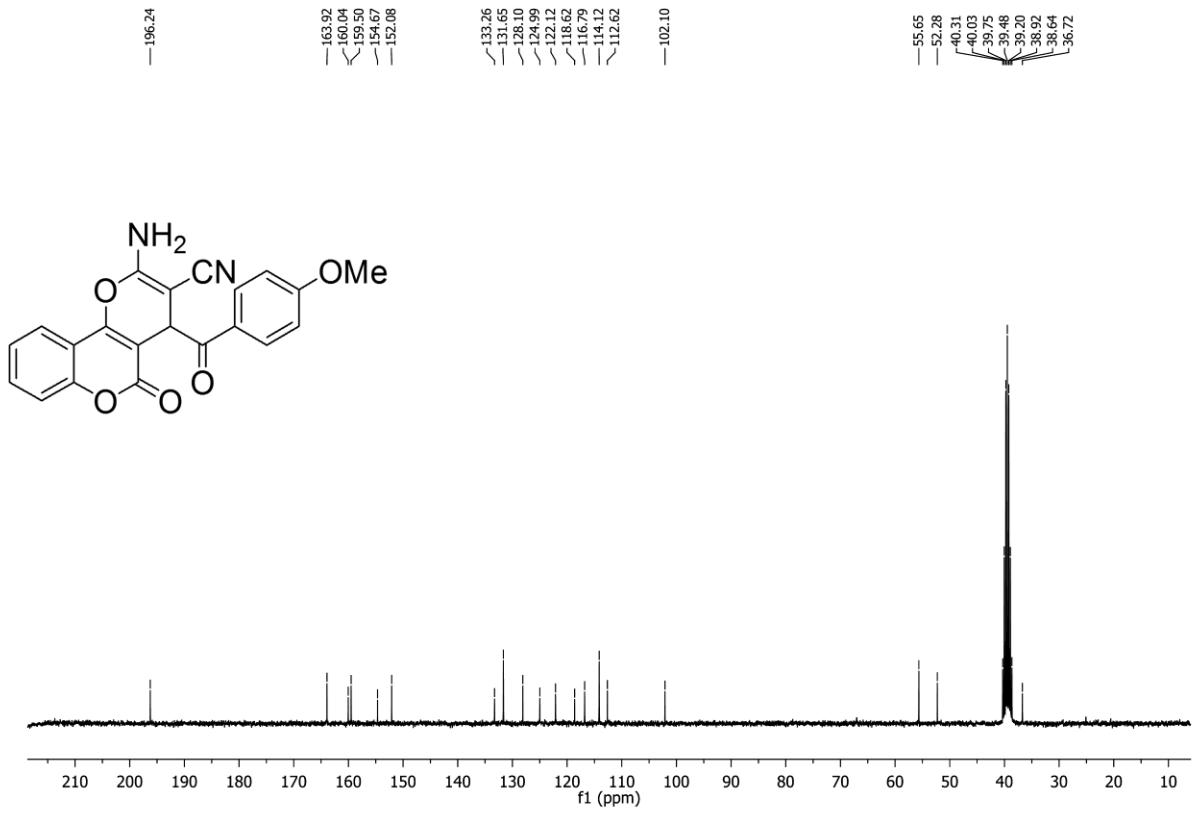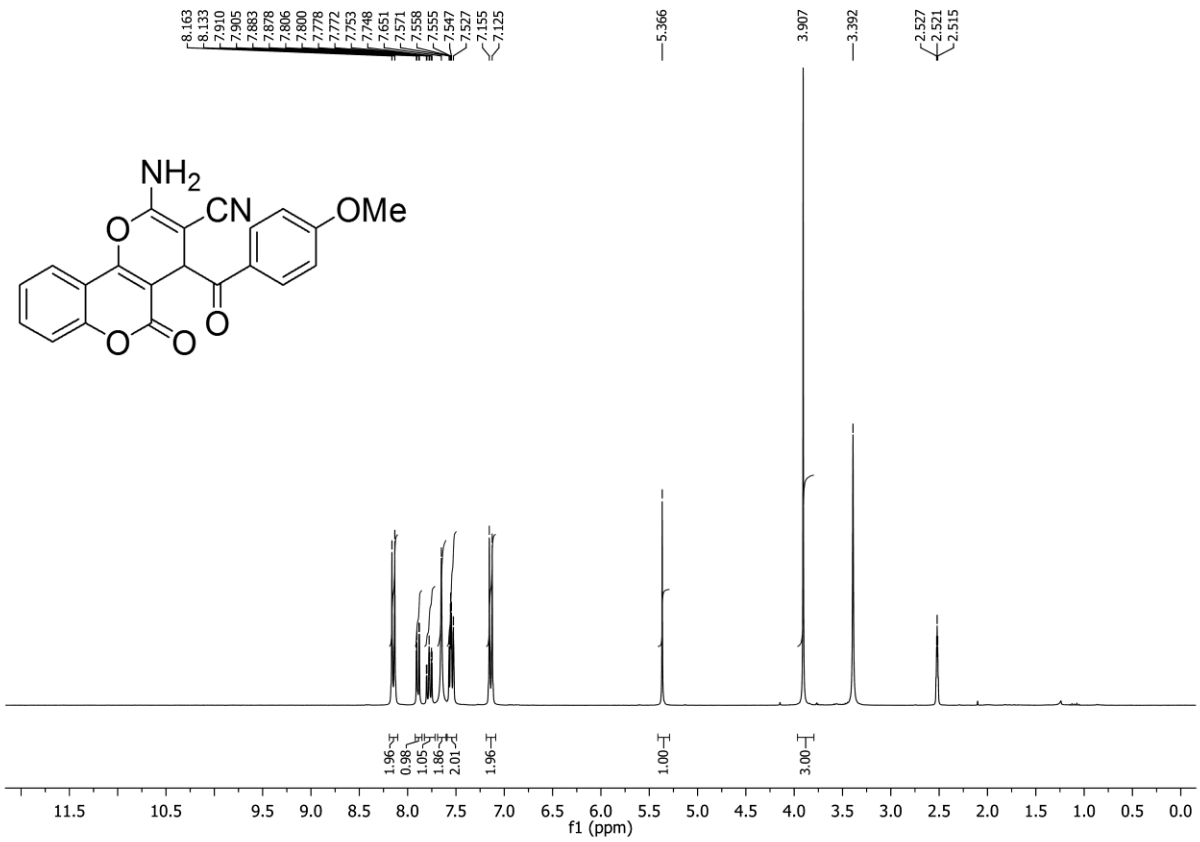

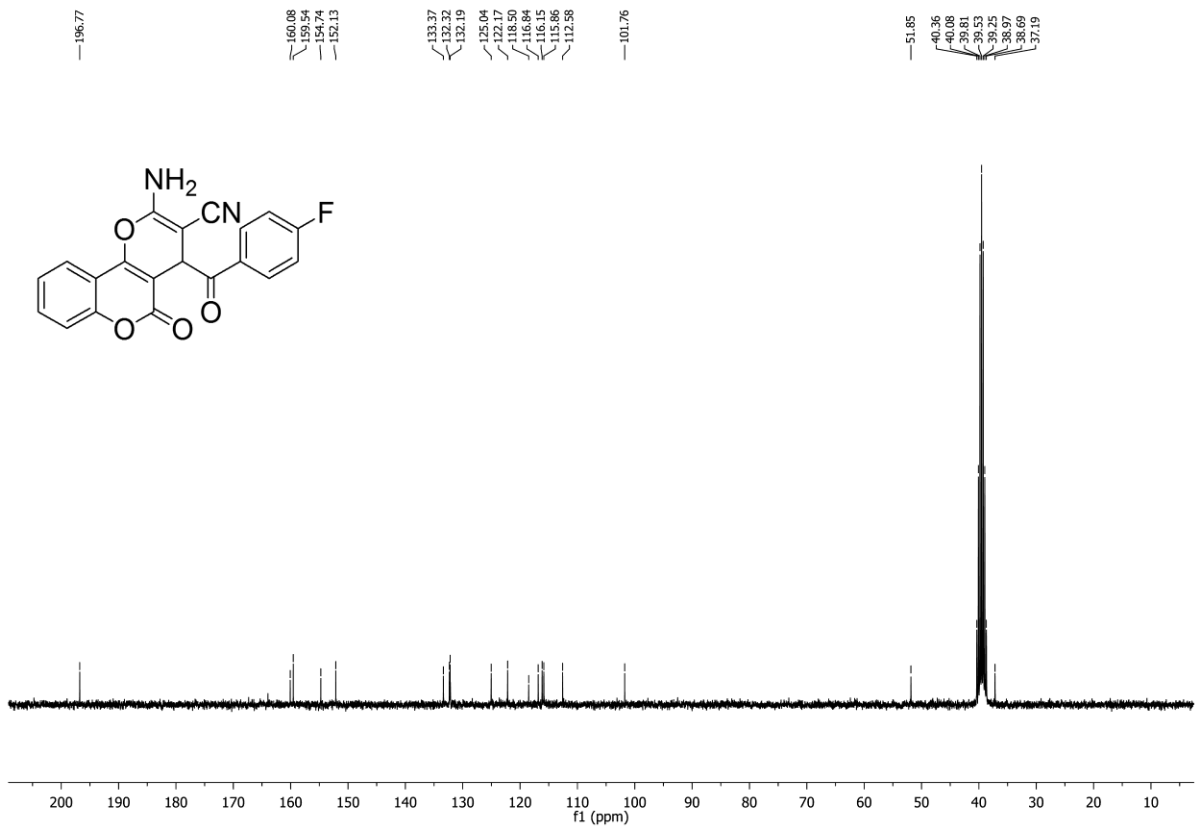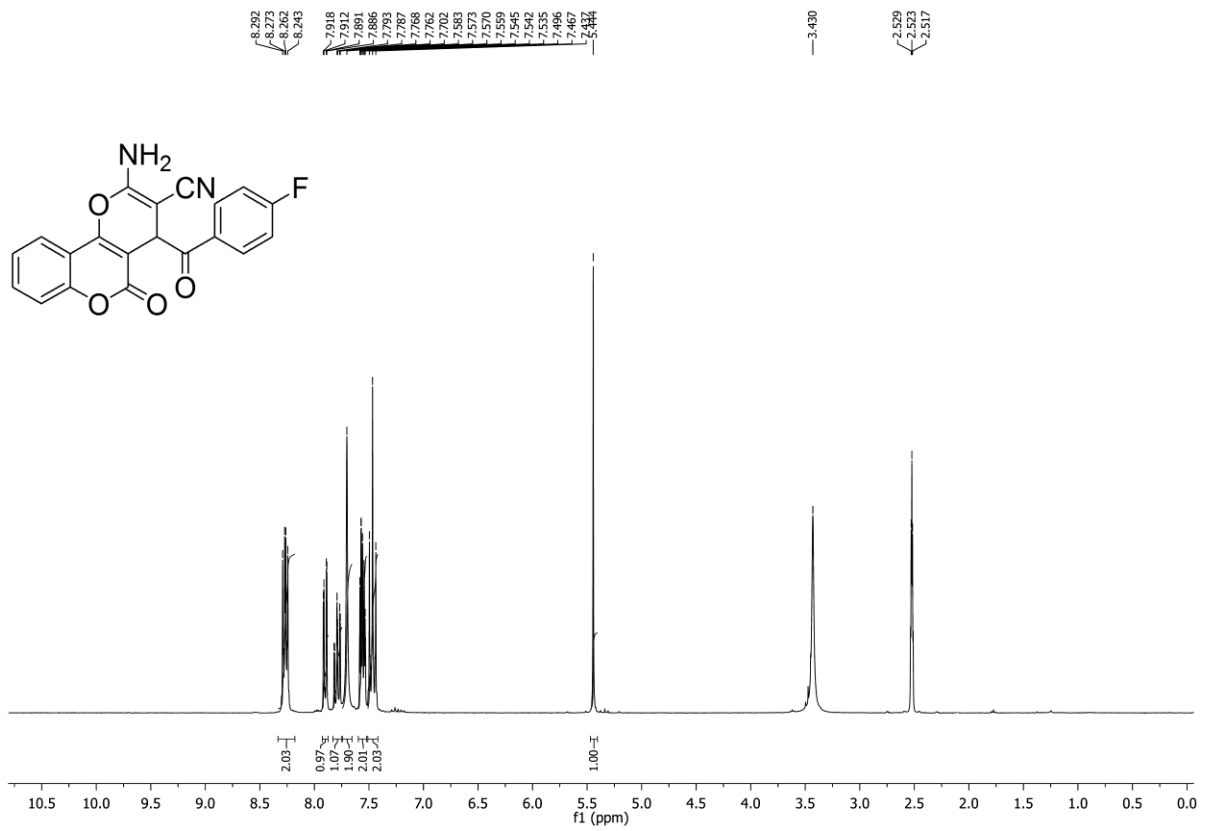

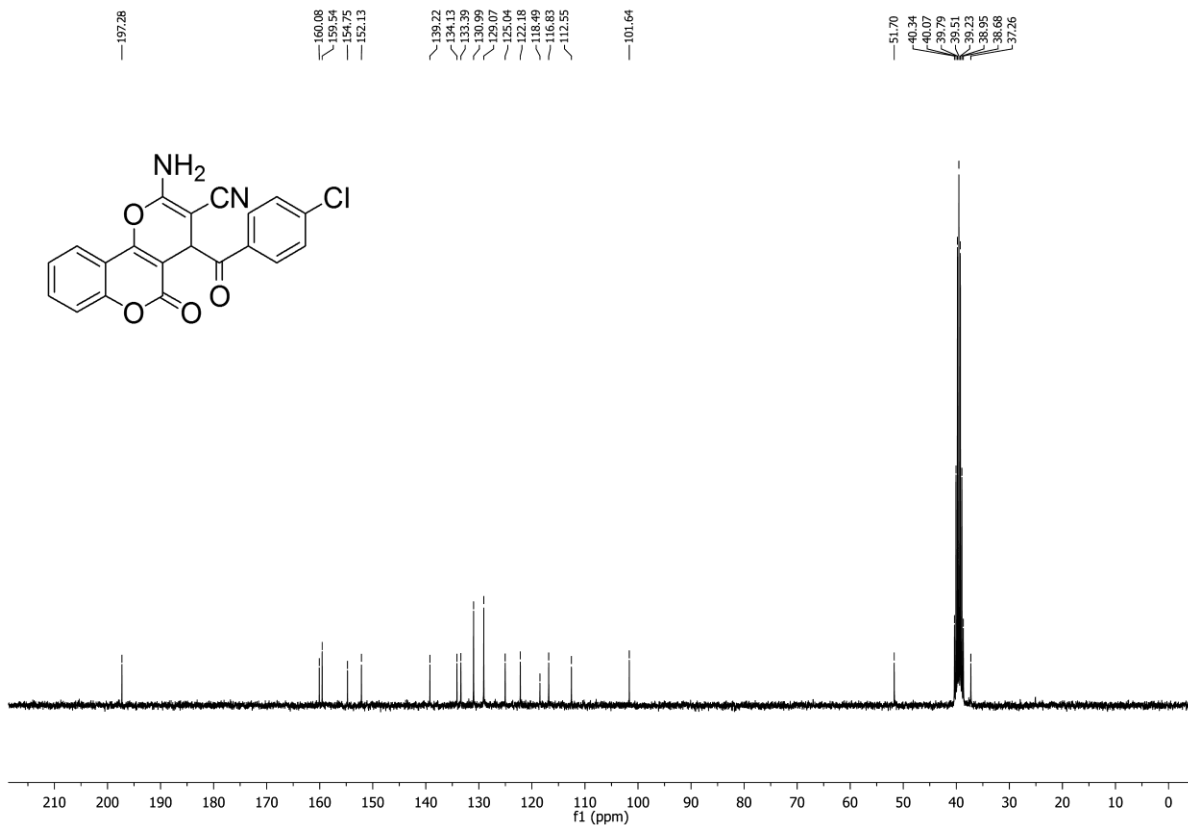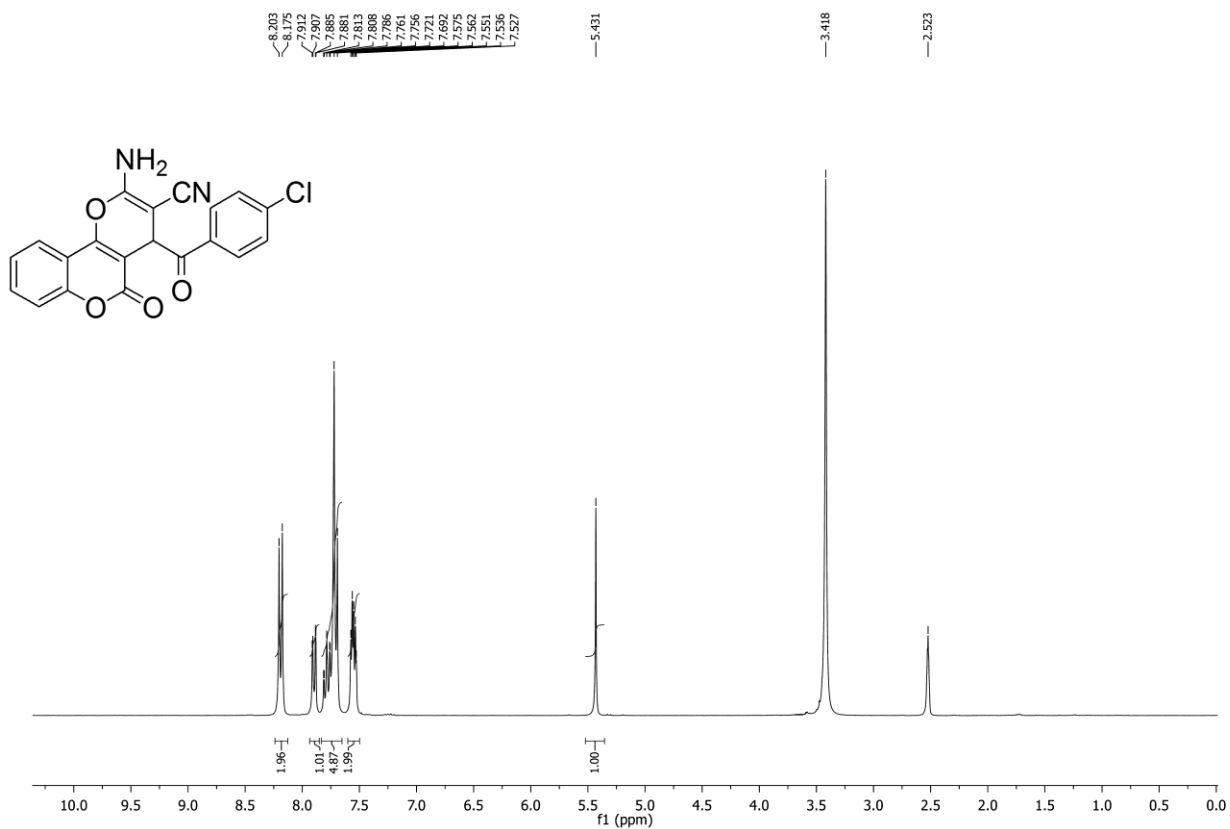

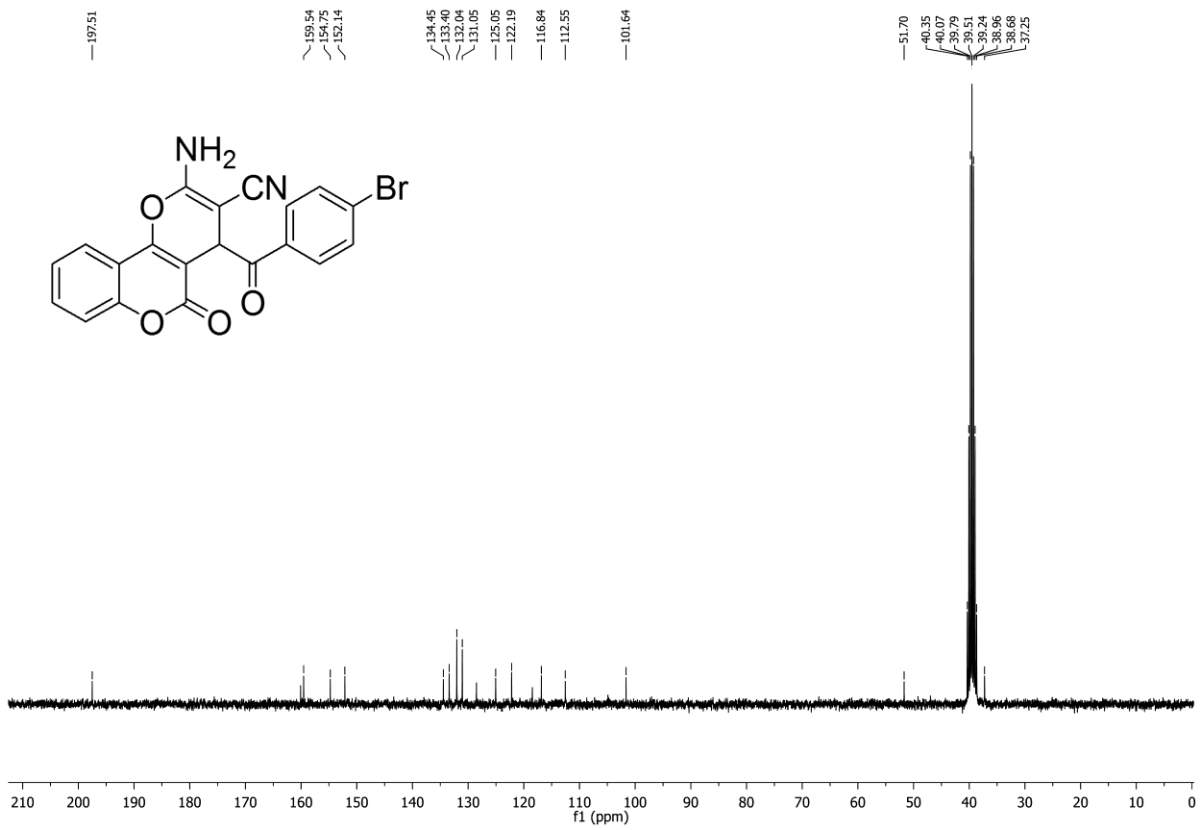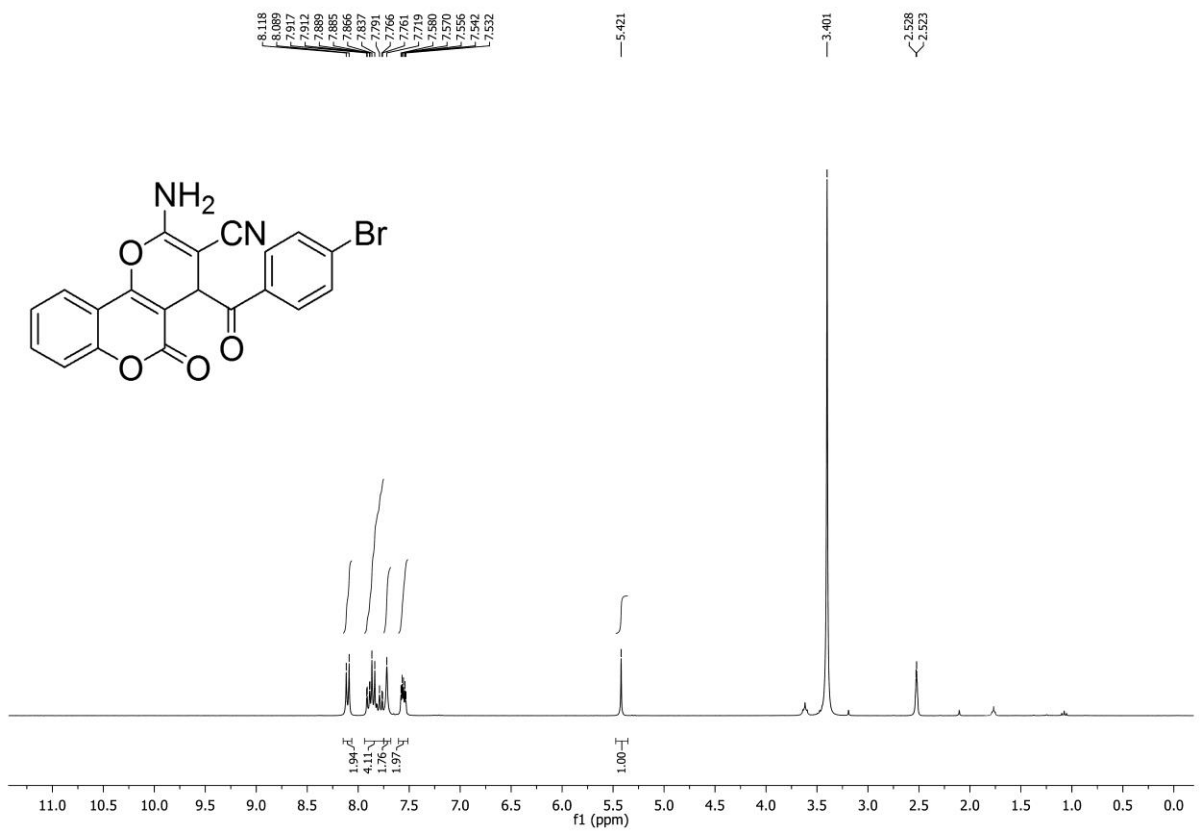

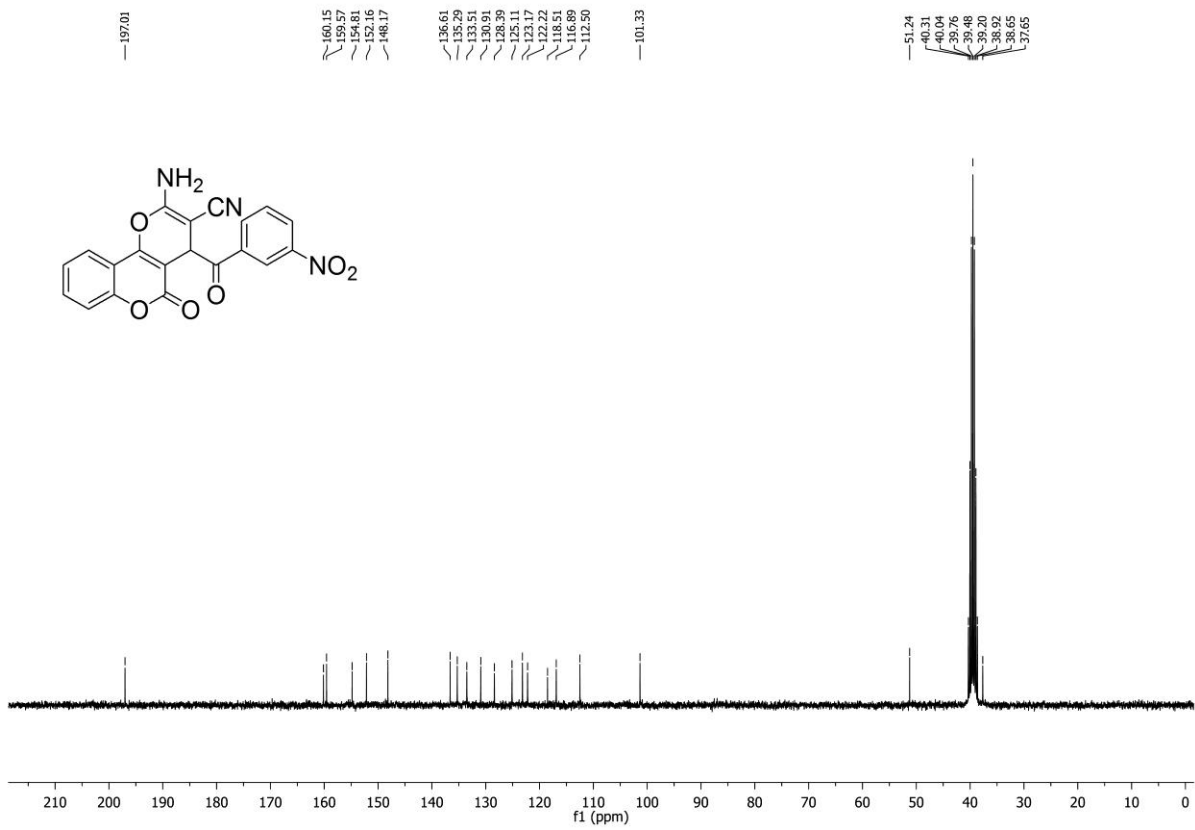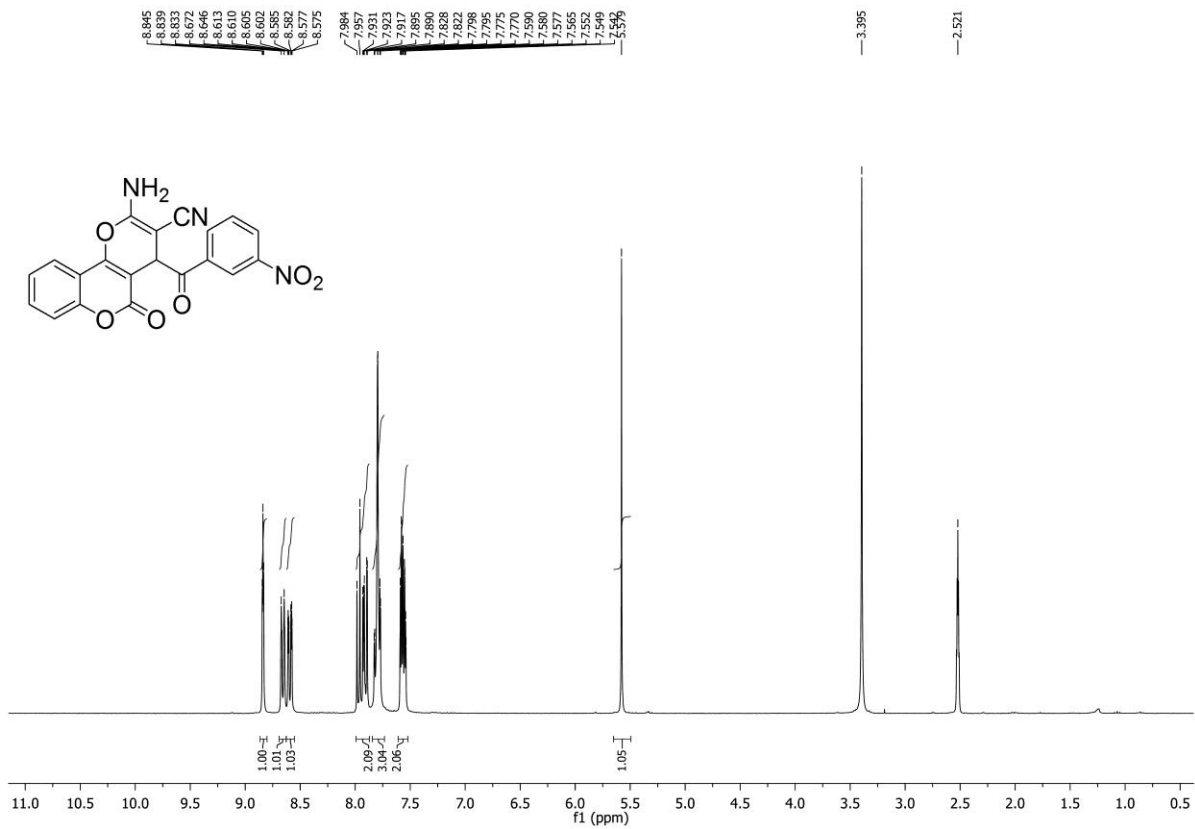



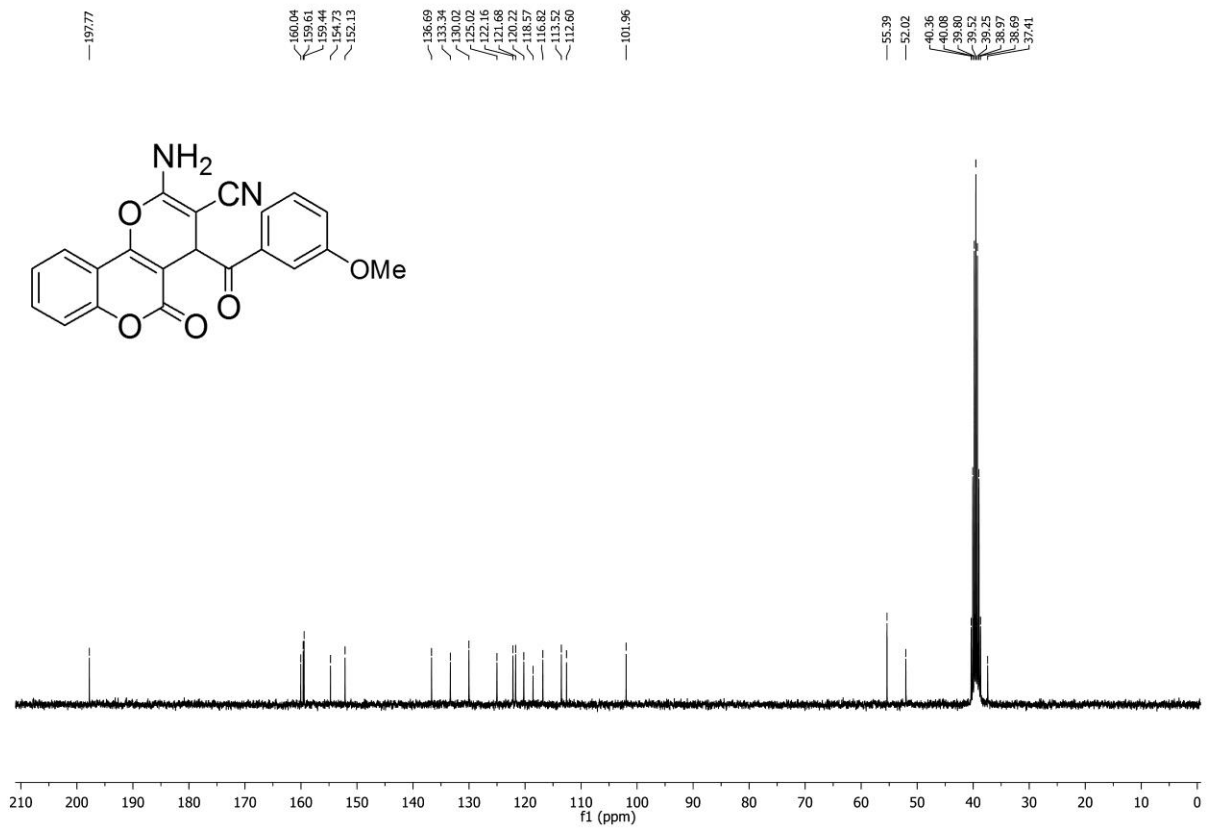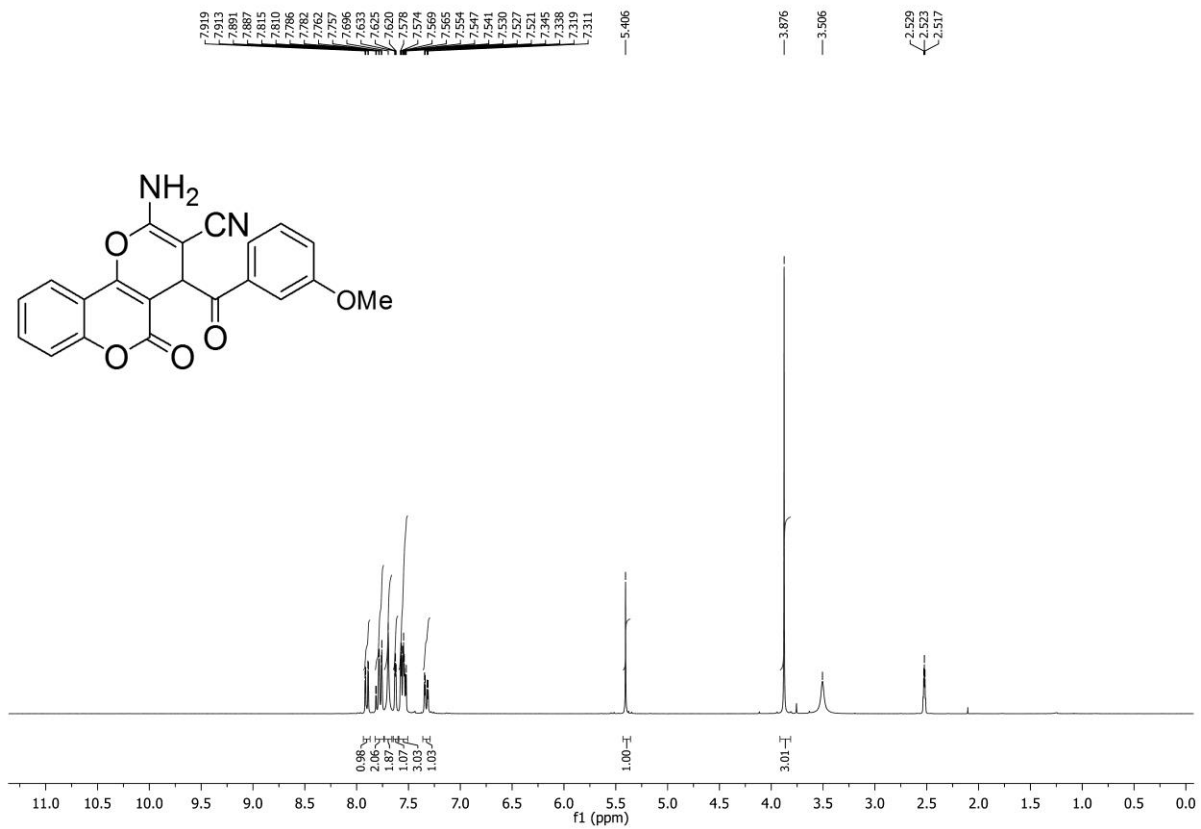

—199.66

159.56  
157.68  
153.82  
152.05  
133.27  
132.93  
130.93  
128.47  
127.43  
126.18  
126.13  
126.02  
125.85  
125.75  
124.74  
123.43  
122.45  
119.15  
116.61  
112.96  
104.65

—53.62

39.87  
39.67  
39.46  
39.25  
39.04  
37.27

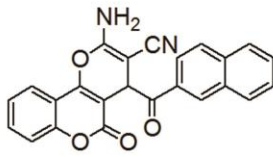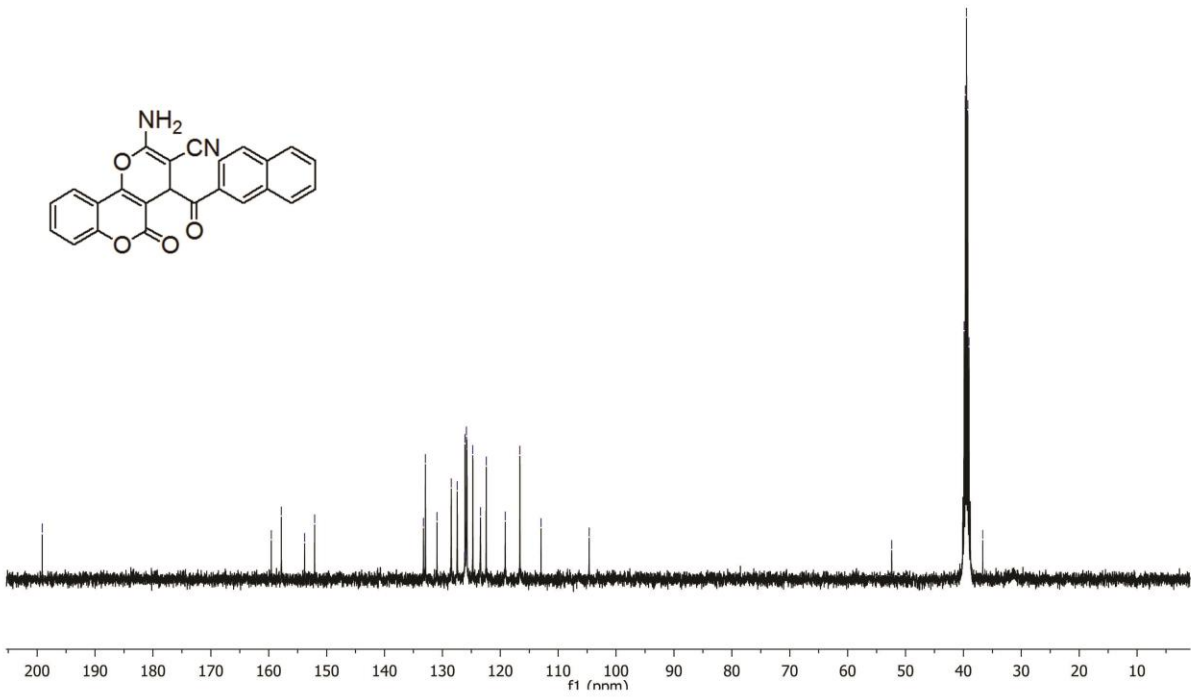

8.445  
7.982  
7.978  
7.962  
7.958  
7.948  
7.935  
7.945  
7.728  
7.724  
7.666  
7.579  
7.576  
7.562  
7.549  
7.544  
7.527  
7.498  
7.477  
7.463  
7.445  
7.425  
7.393  
7.343  
5.477

3.360

2.513  
2.509  
2.504

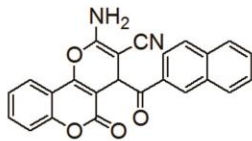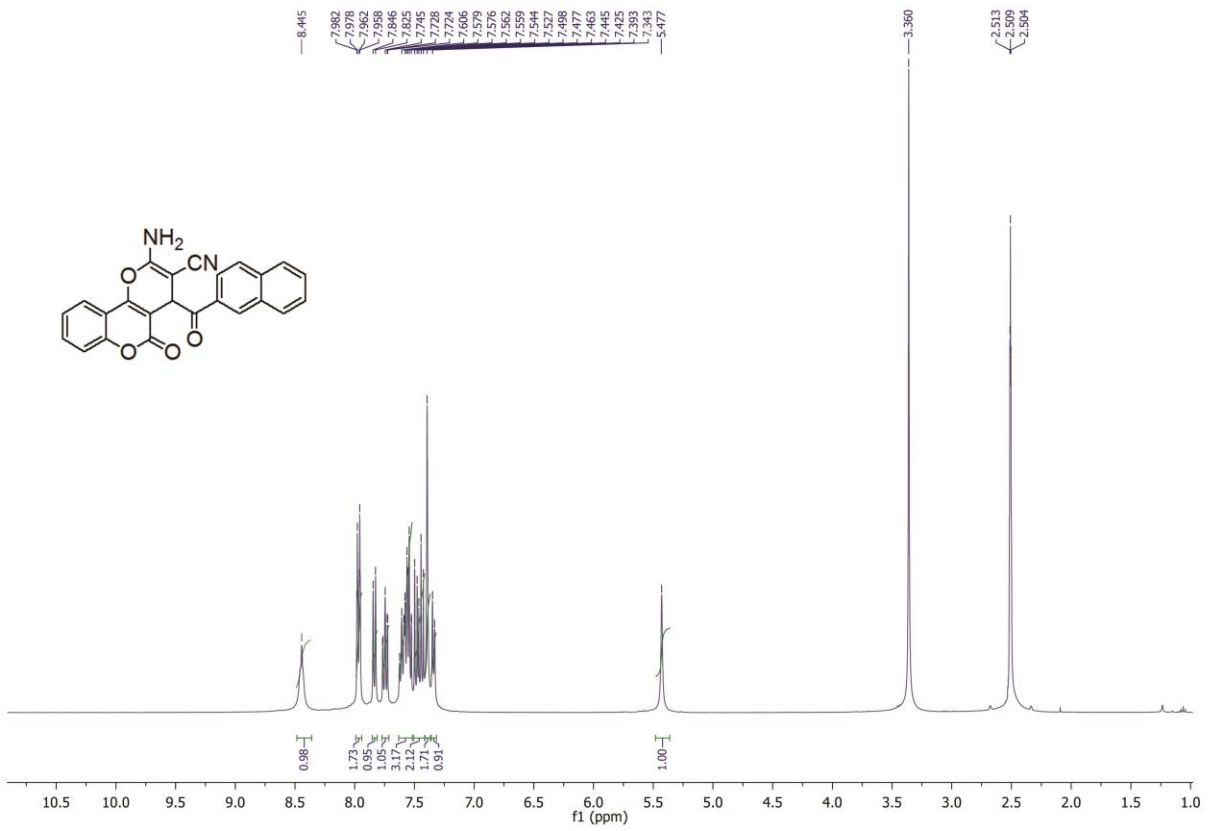

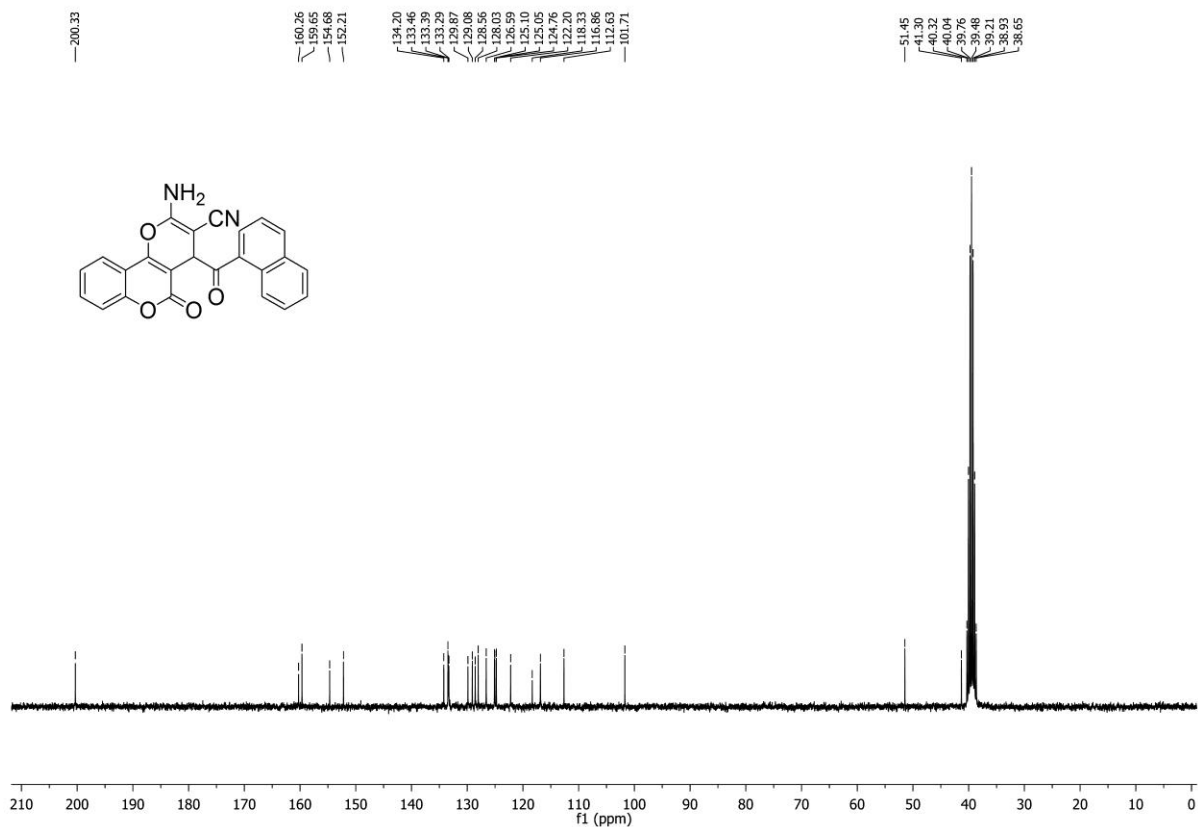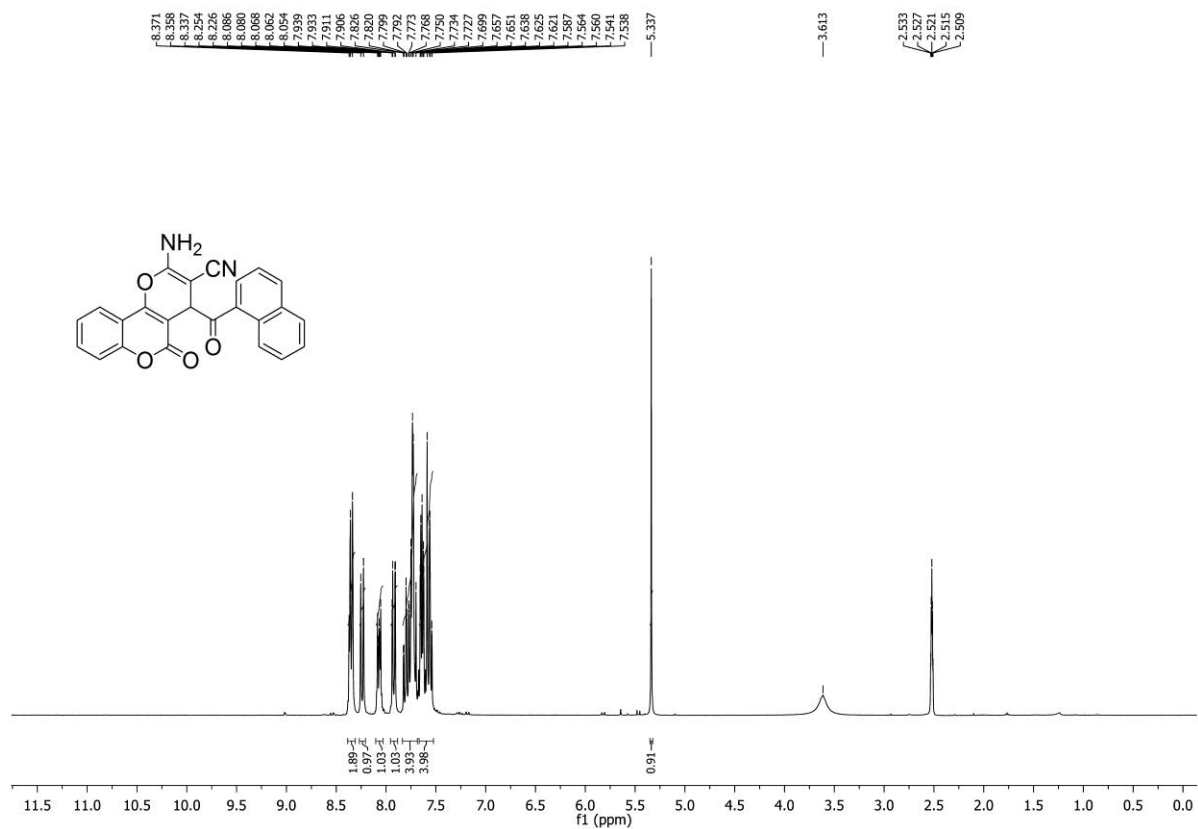

Supplement: c4nj00228h1.pdf [file c4nj00228h1.pdf]
